# Supplementary material for: A portable, 3D printed, microfluidic device for multiplexed, real time, molecular detection of the porcine epidemic diarrhea virus, transmissible gastroenteritis virus, and porcine deltacoronavirus at the point of need
Source: Royal Society of Chemistry journal article supplement (doi:10.1039/d0lc01229g), 2021-01-01
Supplement: d0lc01229g1.pdf [file d0lc01229g1.pdf]

### Supporting Information

## **A Portable, 3-D Printed, Microfluidic Device for Multiplexed, Real Time, Molecular Detection of Porcine Epidemic Diarrhea Virus, Transmissible Gastroenteritis Virus, and Porcine Deltacoronavirus at the Point of Need**

**Mohamed El-Tholoth,<sup>\* ‡ a, b, c</sup>, Huiwen Bai,<sup>‡ b</sup> Michael G. Mauk,<sup>b</sup> Linda Saif,<sup>d</sup> and Haim H. Bau<sup>b</sup>**

<sup>a</sup> Department of Virology, Faculty of Veterinary Medicine, Mansoura University, Mansoura 35516, Egypt (Permanent address)

<sup>b</sup> Department of Mechanical Engineering and Applied Mechanics, University of Pennsylvania, Philadelphia, Pennsylvania 19104, United States.

<sup>c</sup> Health Sciences Division, Veterinary Sciences Program, Al Ain Men's Campus, Higher Colleges of Technology, Al Ain 17155, UAE.

<sup>d</sup> Food Animal Health Research Program, Ohio Agricultural Research and Development Center, College of Food, Agriculture and Environmental Sciences, Department of Veterinary Preventive Medicine, College of Veterinary Medicine, The Ohio State University, Wooster, OH, USA.

**‡ These authors contributed equally**

**\* Corresponding author:**

**Dr. Mohamed El-Tholoth**

Department of Virology

Faculty of Veterinary Medicine

Mansoura University

Egypt

Mobile: +2-01030519150

Tel: +2 (050) 2372593, +2 (050) 2372592

Fax: +2 (050) 2379952

*E-mail:* [tholothvirol@mans.edu.eg](mailto:tholothvirol@mans.edu.eg)

ORCID ID: <https://orcid.org/0000-0002-5253-5168>

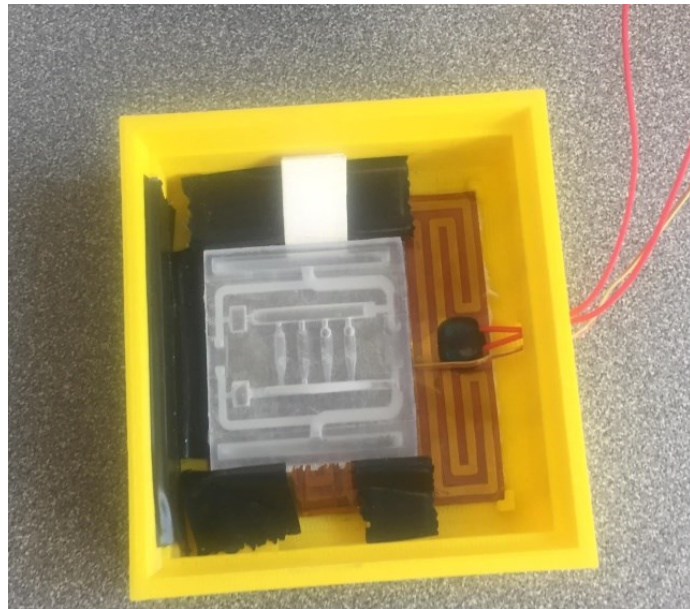

**Fig. S1** A 3D-printed microfluidic chip mounted on top of our custom-made portable heater.

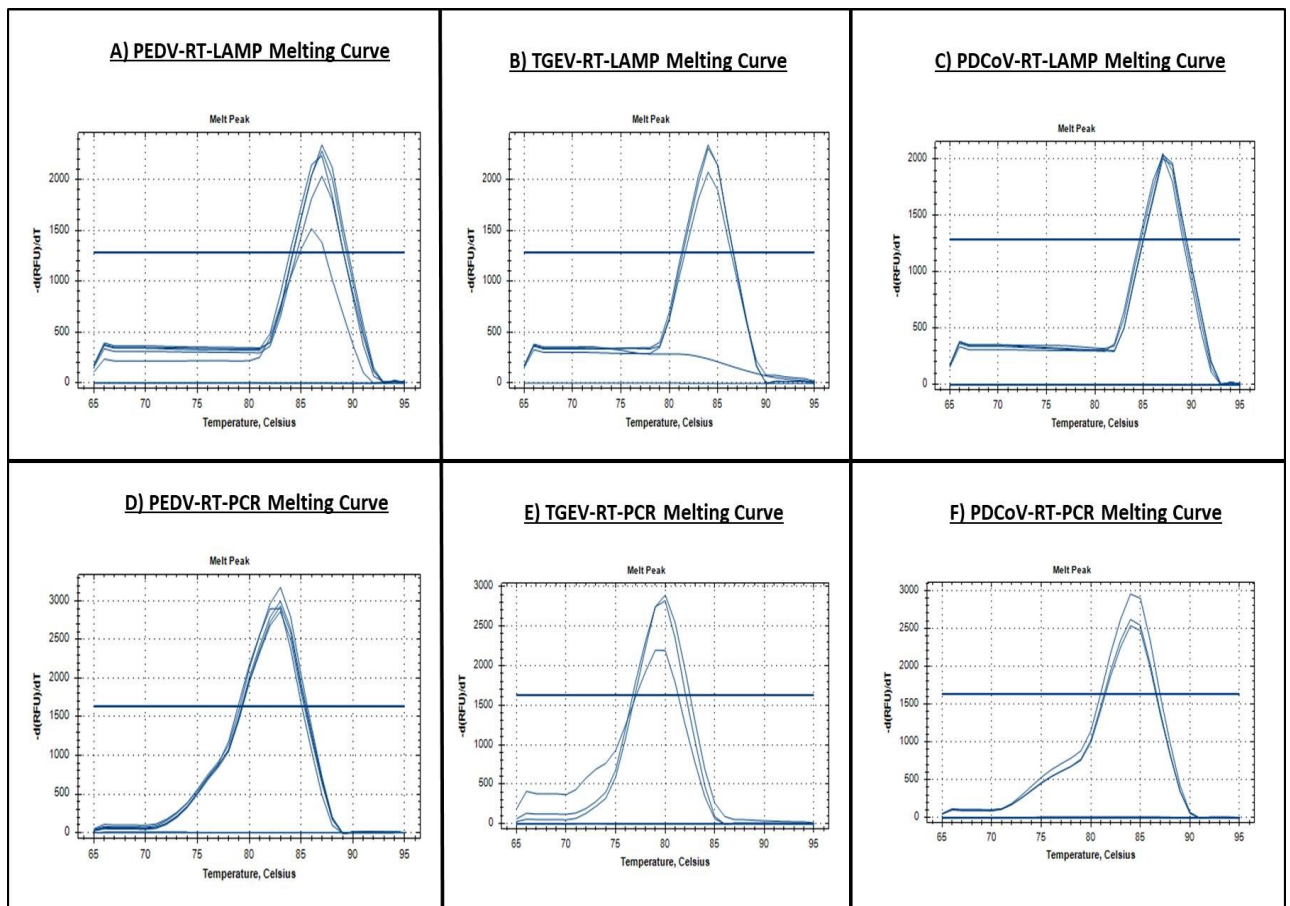

**Fig. S2** Melting curve analysis of both RT-LAMP and RT-PCR products reveals a single peak.

**Table S1:** Threshold LAMP times (min) and threshold RT-PCR cycles of our microfluidic and benchtop tests of our clinical samples

| Sample no | Our RT-PCR | Our RT-LAMP | Our Microfluidic based RT-LAMP |
|-----------|------------|-------------|--------------------------------|
| PEDV 1    | 22.08      | 7.31        | 8.51                           |
| PEDV 2    | 19.28      | 6.4         | 8.01                           |
| PEDV 3    | 17.75      | 5.42        | 7.14                           |
| PEDV 4    | 17.11      | 5           | 6                              |
| PEDV 5    | 24.13      | 8.29        | 9.11                           |
| TGEV 1    | 33.13      | 10.26       | 20.14                          |
| TGEV 2    | 20.22      | 7.24        | 12.4                           |
| TGEV3     | 32.27      | 10.02       | 16.35                          |
| PDCoV 1   | 18.2       | 10.05       | 12.12                          |
| PDCoV 2   | 18.9       | 10.51       | 12.9                           |
| PDCoV3    | 19.75      | 11.09       | 20.01                          |
| Control   | 0          | 0           | 0                              |

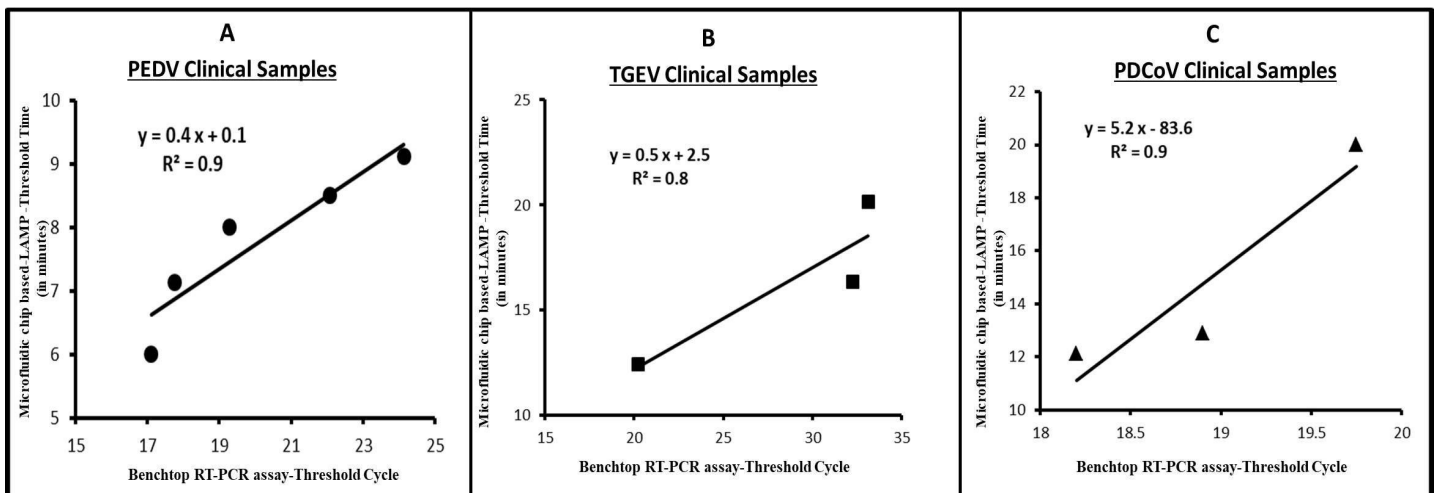

**Fig. S3** Testing of clinical samples from diseased piglets with the microfluidic based-LAMP and benchtop RT-PCR assays. Microfluidic based LAMP-threshold time as a function of qRT-PCR threshold cycle for PEDV (A), TGEV (B), and PDCoV (C) clinical samples.
